# Supplementary material for: One-pot ruthenium catalyzed synthesis of spiro[pyrrolidin-2-one] derivatives by a [2 + 2 + 1] cycloaddition of ketimines, carbon monoxide and ethylene
Source: Royal Society of Chemistry journal article supplement (doi:10.1039/b008290m), 2001-01-01
Supplement: b008290m.doc [file b008290m.doc]

**Supplementary Material**

**Experimental**

*General*. All procedures were carried out under an argon atmosphere in anhydrous, freshly distilled solvents. The preparation of **1**-**3** and **7** was done following the procedures published in [7]. Infrared spectra were recorded on a Perkin Elmer FT-IR System 2000 using 0.2 mm KBr cuvettes. NMR spectra were recorded on a Bruker AC 200 spectrometer (1H: 200 MHz, 13C: 50.32 MHz, CDCl3 as internal standard) and on a Bruker DRX 400 spectrometer (1H: 400 MHz, 13C: 100.62 MHz with CDCl3 as internal standard). Mass spectra were recorded on a Finnigan MAT SSQ 710 instrument. High resolution mass spectra were recorded on a Finnigan MAT 95 XL using ESI techniques and methanol as the solvent. Elemental analyses were carried out at the Institute of Organic and Macromolecular Chemistry of the Friedrich-Schiller-University, Jena.

*X-ray Crystallographic Study.* The structure determination of **4** was carried out on an Enraf Nonius Kappa CCD diffractometer, crystal detector distance 25 mm, 180 frames, using graphite monochromated Mo-Ka radiation. The crystal was mounted in a stream of cold nitrogen. Data were corrected for Lorentz and polarization effects but not for absorption. The structure was solved by direct methods and refined by full-matrix least squares techniques against F2 using the programs SHELXS86 and SHELXL93 [a]. Computation of the structure was done with the program XPMA [b] and the molecular illustration was drawn using the program XP [c]. The crystal and intensity data are given in [9].

*Synthesis of* ***4****-****6*** *from* ***1****-****3****.* 1 mmol of the corresponding N,N´-bis-aryl-tetrahydropyrrolo-
[2,1-c][1,4]oxazine-3,4-diylidenediamine (**1**: R = p-tolyl, 333 mg; **2**: R = p-anisyl, 365 mg; **3**: R = Mes, 390 mg) are transferred together with 0.04 mmol Ru3(CO)12 (26 mg) into a 75 ml stainless steel autoclave. Then the autoclave is evaporated and 3 mL of toluene are added. Afterwards the autoclave is pressurized with 12 atm CO and 8 atm ethylene and the reaction mixture is heated to 140°C for 16 h. After the autoclave is cooled down to room temperature the pressure is released and the solution is transferred into a Schlenk tube. After the toluene is evaporated a brown oily residue is obtained. This residue was used to determine the yield of **5** (55%) and **6** (80%) by NMR spectroscopy. In the case of **4** (overall yield 75%) the residue is recrystallized from toluene to produce crystals of one of the diastereomers of **4**, in which C6 is *R*-configurated and which by NMR spectroscopy is the major component of the crude reaction mixture (yield 97 mg, 25%, m.p. 214-216°C).

*Synthesis of* ***4*** *from* ***7****.* 0.14 mmol of the iron carbonyl complex **7** (83 mg) are transferred together with 0.005 mmol Ru3(CO)12 (4 mg) into a 75 ml stainless steel autoclave. Then the autoclave is evaporated and 0.5 mL of toluene are added. Afterwards the autoclave is pressurized with 13 atm CO and 8 atm ethylene and the reaction mixture is heated to 140°C for 16 h. After the autoclave is cooled down to room temperature the pressure is released and the solution is transferred into a Schlenk tube. After the toluene is evaporated a brown oily residue is obtained. The 13C-NMR spectrum of this residue showed that the reaction yielded **4** quantitatively also obtaining the same ratio of diastereomers as in the reaction starting from **1**.

*Analytical data of* ***4***. Elemental analysis [%] found (calculated): C 74.02 (74.01), H 7.05 (6.99), N 10.47 (10.79); MS (CI, H20) [m/z] (fragment, %): 390 (M+, 100), 269 (C16H19N3O+, 14), 131 (C7H5N3+, 21); IR (Nujol, 293 K) [cm-1]: 1702 (C=O), 1635 (C=N); NMR-spectra (*R*-configuration at C6): 1H-NMR (CDCl3, 293 K) [ppm]: 0.98-1.01 (m, 1H), 1.54-1.73 (m, 3H), 2.20-2.23 (m, 1H), 2.25 (s, 3H), 2.34 (s, 3H), 2.51-3.12 (m, 6H), 3.53-3.58 (m, 1H), 3.78-3.83 (m, 1H), 6.62 (d, 3JHH = 8.1 Hz, 2H), 6.97 (d, 3JHH = 7.9 Hz, 2H), 7.19 (d, 3JHH = 8.1 Hz, 2H), 7.37 (d, 3JHH = 8.3 Hz, 2H); 13C-NMR (CDCl3, 293 K) [ppm]: 20.7, 21.1, 23.5, 27.4, 29.6, 35.6, 49.8, 57.9, 67.3, 94.3, 120.8, 128.5, 129.2, 129.5, 130.2, 134.4, 137.6, 147.4, 149.2, 175.2; *S*-configuration at C6: 1H-NMR (CDCl3, 293 K) [ppm]: 0.94-1.32 (m, 2H), 1.35-2.04 (m, 4H), 2.25 (s, 3H), 2.36 (s, 3H), 2.55-3.15 (m, 4H), 3.52-3.74 (m, 2H), 4.05-4.18 (m, 1H) 6.74-7.28 (m, 8H); 13C-NMR (CDCl3, 293 K) [ppm]: 20.5, 20.9, 21.2, 23.0, 27.6, 32.9, 50.2, 57.3, 66.4, 95.6, 120.8, 125.2, 127.9, 128.1, 128.3, 128.9, 129.1, 129.9, 134.1, 136.7, 137.7, 147.5, 149.5, 175.1.

*Analytical data of* ***5***. HRMS: 446.28283, C28H36N3O2 (MH+),  = 0.716267 mmu; MS (CI, H2O) [m/z] (fragment, %): 446 (MH+, 2), 390 (C24H27N3O2+, 100), 374 (C23H23N3O2+, 10), 136 (C7H10N3+, 15), 93 (C7H9+, 85); IR (Nujol, 293 K) [cm-1]: 1693 (C=O), 1642 (C=N); NMR-spectra (mixture of diastereomers): 1H-NMR (CDCl3, 293 K) [ppm]: 0.92-1.22 (m, 2H), 1.28-1.65 (m, 4H), 1.82-2.45 (m, 18H), 2.52-2.78 (m, 2H), 2.85-3.52 (m, 4H), 3.89-4.02 (m, 1H), 6.80-6.96 (m, 2H), 7.23-7.47 (m, 2H); 13C-NMR (CDCl3, 293K) [ppm]: 18.7, 18.8, 18.9, 19.2, 19.4, 19.5, 19.6, 20.6, 20.9, 21.3, 23.3, 23.9, 27.4, 28.3, 31.3, 31.7, 36.2, 38.4, 47.7, 48.1, 55.8, 56.8, 66.8, 69.3, 92.7, 97.2, 125.2, 126.6, 126.7, 127.0, 127.4, 127.5, 127.7, 128.2, 128.4, 128.6, 128.7, 128.9, 129.1, 129.5, 129.6, 129.9, 130.2, 130.3, 132.0, 133.0, 137.7, 137.9, 138.0, 138.3, 138.4, 138.7, 141.8, 142.4, 142.5, 152.0, 174.7, 175.8.

Analytical data of **6**. HRMS: 422.20851, C24H28N3O4 (MH+),  = 0.064738 mmu; MS (CI, H2O) [m/z] (fragment, %): 422 (MH+, 98), 344 (C21H18N3O2+, 9), 307 (C18H17N3O2+, 8), 301 (C18H11N3O2+, 21), 279 (C16H13N3O2+, 19), 261 (C16H11N3O+, 24), 235 (C14H9N3O+, 50), 158 (C9H6N2O+, 48), 124 (C7H10NO+, 100), 108 (C7H10N+, 19), 84 (C5H10N+, 14); IR (Nujol, 293 K) [cm-1]: 1705 (C=O), 1631 (C=N); NMR-spectra (mixture of diastereomers): 1H-NMR (CDCl3, 293 K) [ppm]: 0.95-1.40 (m, 1H), 1.43-2.52 (m, 6H), 2.65-3.28 (m, 4H), 3.46-3.72 (m, 2H), 3.78 (s, 3H), 3.87 (s, 3H), 4.08-4.21 (m, 1H), 6.39-6.52 (m, 1H), 6.65-7.09 (m, 3H), 7.17-7.68 (m, 4H); 13C-NMR (CDCl3, 293 K) [ppm]: 21.3, 23.2, 23.5, 27.5, 29.5, 30.2, 32.8, 35.4, 49.8, 50.3, 55.3, 55.4, 57.3, 57.9, 66.2, 67.2, 94.6, 95.6, 113.2, 113.4, 113.7, 113.8, 114.0, 121.7, 121.8, 125.2, 128.1, 128.9, 129.4, 129.6, 129.7, 130.5, 137.7, 143.4, 149.9, 154.2, 154.3, 158.6, 159.0, 175.3.

**References**

[a] (a) G. Sheldrick, SHELXS-86, Universität Göttingen **1986**; (b)G. Sheldrick, SHELXL-93, Universität Göttingen **1993**.

[b] L. Zsolnai, G. Huttner, XPMA, Universität Heidelberg **1996**.

[c] Siemens Analytical Xray Inst. Inc., XP - Interactive Molecular Graphics, Vers. 4.2, **1990**.
